# Supplementary material for: Thermally Triggered Mechanically Destructive Electronics Based On Electrospun Poly(ε-caprolactone) Nanofibrous Polymer Films
Source: PubMed Central journal article supplement (PMC5430441; doi:10.1038/s41598-017-01026-6), 2017-04-19
Supplement: 41598_2017_1026_MOESM1_ESM.pdf [file 41598_2017_1026_MOESM1_ESM.pdf]

Supplementary Information

**Thermally Triggered Mechanically Destructive Electronics Based On Electrospun Poly( $\epsilon$ -caprolactone) Nanofibrous Polymer Films**

Yang Gao<sup>a,b,\*</sup>, Kyoseung Sim<sup>c</sup>, Xin Yan<sup>a</sup>, Jiang Jiang<sup>d</sup>, Jingwei Xie<sup>d</sup>, & Cunjiang Yu<sup>a,c,e,\*</sup>

<sup>a</sup> Department of Mechanical Engineering, University of Houston, Houston, TX 77204 (USA)

<sup>b</sup> School of Mechanical and Power Engineering, East China University of Science and Technology, Shanghai 200237 (China)

<sup>c</sup> Materials Science and Engineering Program, University of Houston, Houston, TX 77204 (USA)

<sup>d</sup> Department of Surgery, Mary & Dick Holland Regenerative Medicine Program, University of Nebraska Medical Center, Omaha, NE 68198 (USA)

<sup>e</sup> Department of Electrical and Computer Engineering, University of Houston, Houston, TX 77204 (USA)

\*Corresponding Authors, E-mail: ygao1412809@163.com; cyu15@uh.edu.

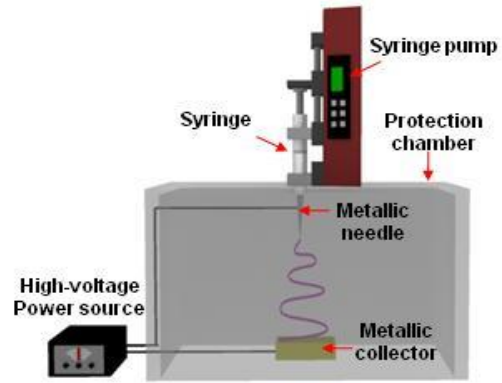

**Figure S1.** Schematic illustration of the experimental setup for electrospinning.

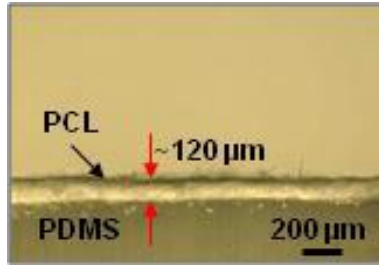

**Figure S2.** Optical cross-sectional image of an electrospun PCL nanofibrous polymer film.

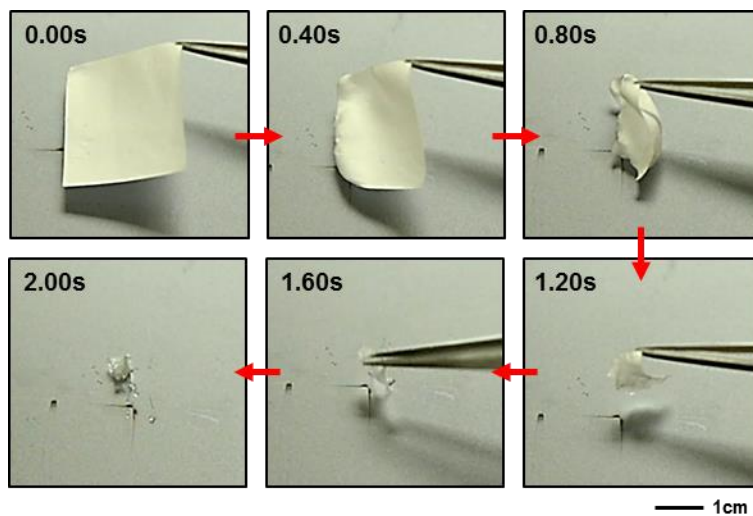

**Figure S3.** Sequential images of the time-lapse shrinkage process for the PCL nanofibrous film.

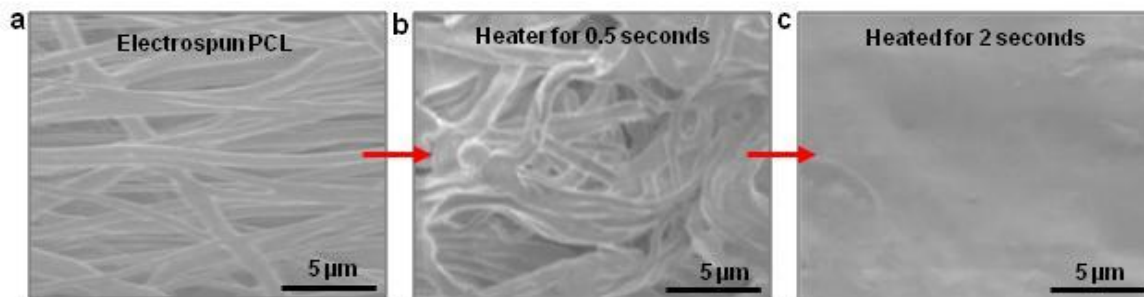

**Figure S4.** Time sequential SEM images of the electrospun PCL nanofibrous polymer film heated at 90 °C.

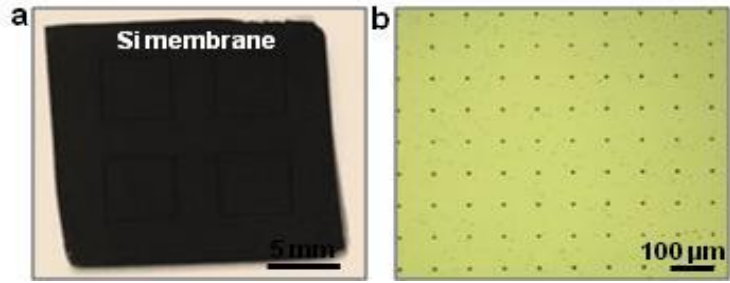

**Figure S5.** (a) and (b) Optical images of the Si membrane on an SOI wafer.

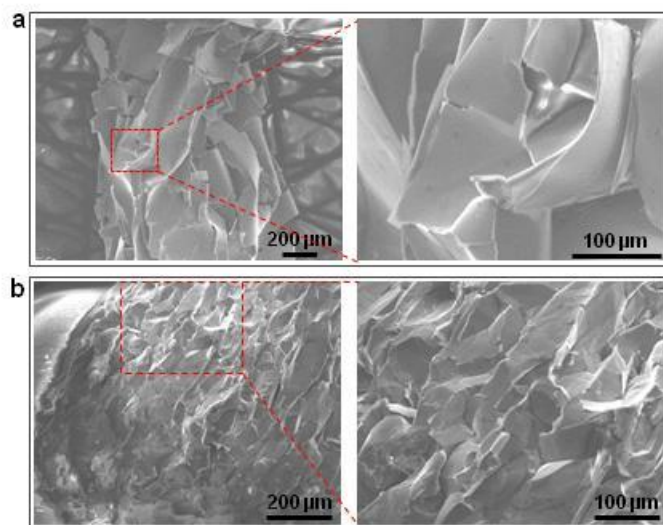

**Figure S6.** SEM images of the (a) 300 and (b) 100 nm thick Si membranes on an electrospun PCL nanofibrous polymer film fragmentatized by heat

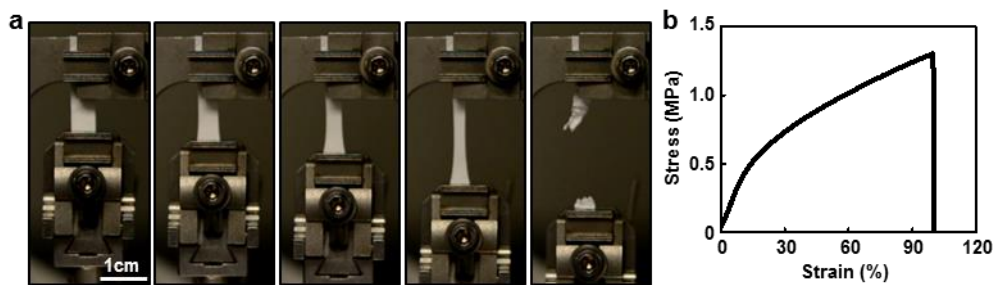

**Figure S7.** (a) Sequential images of PCL nanofibrous film under tensile testing. (b) The obtained Stress-Strain curve.



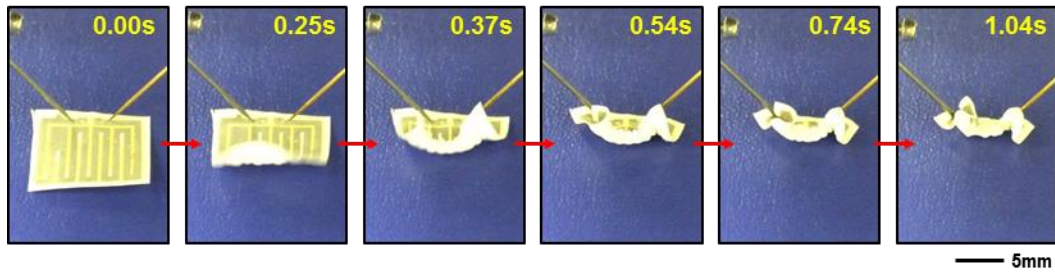

**Figure S8.** Sequential images of PCL nanofibrous film shrinkage triggered with a resistive heater.

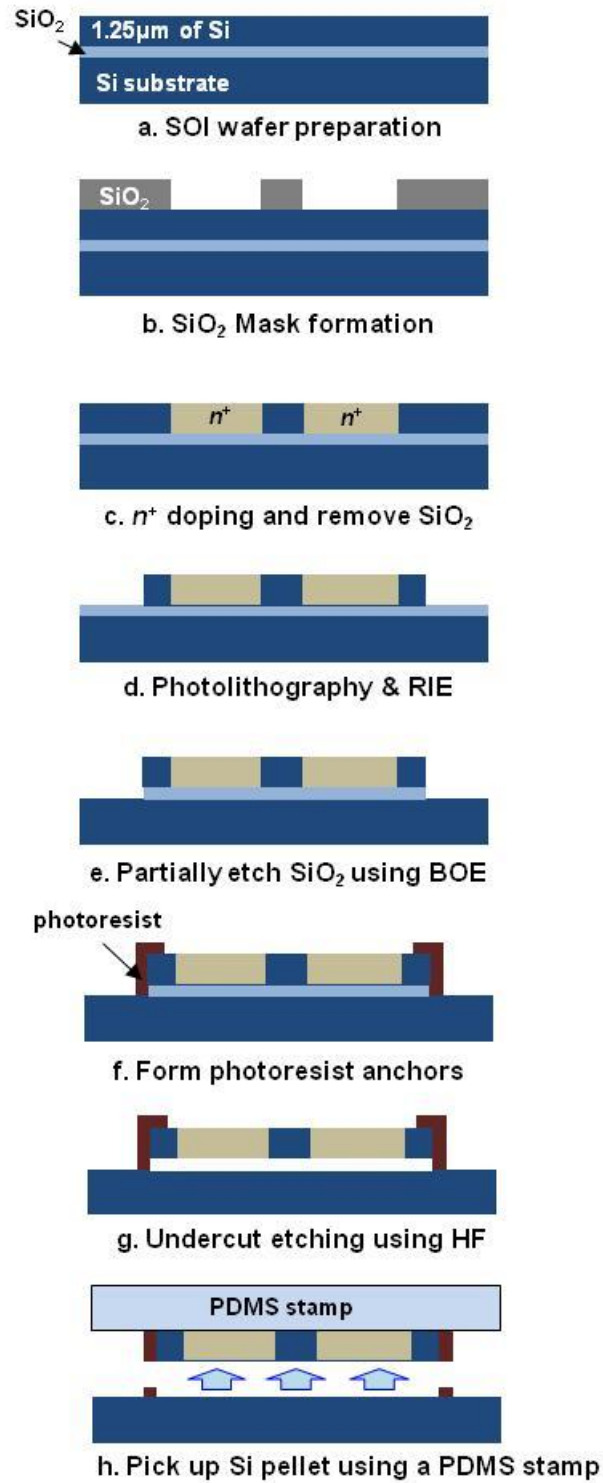

**Figure S9.** Schematic illustration of the device fabrication procedures for the Si based photodetectors.
